# Supplementary material
Source: PubMed Central journal article supplement (PMC6783624)
Supplement: BCP-85-2244-s001.pdf [file BCP-85-2244-s001.pdf]

**Table S1.** Comparative assessment of budesonide-MMX and mesalamine in active, mild-to-moderate UC (sensitivity analysis)

**A. Induction of clinical and endoscopic remission**

|                         |                                 |                                 |                |
|-------------------------|---------------------------------|---------------------------------|----------------|
| <b>Budesonide-MMX</b>   |                                 |                                 |                |
| 1.23 (0.69–2.20)        | <b>Mesalamine &gt;2.4 g/day</b> |                                 |                |
| 1.54 (0.87–2.71)        | <b>1.25 (1.02–1.53)</b>         | <b>Mesalamine 1.6–2.4 g/day</b> |                |
| <b>3.48 (2.01–6.04)</b> | <b>2.84 (2.01–4.00)</b>         | <b>2.27 (1.62–3.18)</b>         | <b>Placebo</b> |

**B. Serious adverse events (SAEs)**

|                       |                                 |                                 |                |
|-----------------------|---------------------------------|---------------------------------|----------------|
| <b>Budesonide-MMX</b> |                                 |                                 |                |
| 1.19 (0.35–4.01)      | <b>Mesalamine &gt;2.4 g/day</b> |                                 |                |
| 0.94 (0.31–2.81)      | 0.79 (0.41–1.54)                | <b>Mesalamine 1.6–2.4 g/day</b> |                |
| 0.80 (0.31–2.09)      | 0.68 (0.27–1.69)                | 0.86 (0.39–1.87)                | <b>Placebo</b> |

**C. Treatment discontinuations or withdrawals from the study due to adverse events (WDAEs)**

|                         |                                 |                                 |                |
|-------------------------|---------------------------------|---------------------------------|----------------|
| <b>Budesonide-MMX</b>   |                                 |                                 |                |
| <b>2.03 (1.09–3.78)</b> | <b>Mesalamine &gt;2.4 g/day</b> |                                 |                |
| 1.57 (0.88–2.79)        | 0.77 (0.52–1.15)                | <b>Mesalamine 1.6–2.4 g/day</b> |                |
| 0.82 (0.52–1.30)        | <b>0.41 (0.25–0.66)</b>         | <b>0.53 (0.34–0.82)</b>         | <b>Placebo</b> |

**Footnote:** The column-defining treatment is compared with the row-defining treatment. The estimates in the cells are odds ratios (ORs) with 95% confidence intervals. For induction of clinical and endoscopic remission, ORs higher than 1.0 favour the treatment in the left upper square. On the opposite, for safety outcomes (SAEs and WDAEs), ORs lower than 1.0 favour the treatment in the left upper square. Statistically significant results are shown in bold.

**Abbreviation:** UC, ulcerative colitis.

**Table S2.** Comparative assessment of budesonide-MMX and mesalamine in active, mild-to-moderate UC (sensitivity analysis)

**A. Induction of clinical and endoscopic remission**

|                                 | SUCRA value (%) | Probability Best (%) | Mean Rank |
|---------------------------------|-----------------|----------------------|-----------|
| <b>Budesonide-MMX</b>           | 89.6            | 75.5                 | 1.3       |
| <b>Mesalamine &gt;2.4 g/day</b> | 74.4            | 24.4                 | 1.8       |
| <b>Mesalamine 1.6–2.4 g/day</b> | 36.0            | 0.1                  | 2.9       |
| <b>Placebo</b>                  | 0.0             | 0.0                  | 4.0       |

**B. Serious adverse events (SAEs)**

|                                 | SUCRA value (%) | Probability Best (%) | Mean Rank |
|---------------------------------|-----------------|----------------------|-----------|
| <b>Budesonide-MMX</b>           | 53.3            | 32.9                 | 2.4       |
| <b>Mesalamine &gt;2.4 g/day</b> | 72.3            | 49.9                 | 1.8       |
| <b>Mesalamine 1.6–2.4 g/day</b> | 45.2            | 10.6                 | 2.6       |
| <b>Placebo</b>                  | 29.2            | 6.6                  | 3.1       |

**C. Treatment discontinuations or withdrawals from the study due to adverse events (WDAEs)**

|                                 | SUCRA value (%) | Probability Best (%) | Mean Rank |
|---------------------------------|-----------------|----------------------|-----------|
| <b>Budesonide-MMX</b>           | 28.8            | 0.8                  | 3.1       |
| <b>Mesalamine &gt;2.4 g/day</b> | 96.3            | 89.5                 | 1.1       |
| <b>Mesalamine 1.6–2.4 g/day</b> | 68.0            | 9.7                  | 2.0       |
| <b>Placebo</b>                  | 7.0             | 0.0                  | 3.8       |

*Footnote:* Herein we present: (i) the SUCRA values providing the hierarchy of the competing treatments, (ii) the estimated probabilities of each treatment being the best, and (iii) the mean rank of each treatment using 10,000 draws.

*Abbreviation:* UC, ulcerative colitis.

**Table S3.** Networks' assessment for homogeneity and consistency (**sensitivity analysis**)

| <b>Outcome</b>                                                                         | <b>Heterogeneity</b><br>(restricted likelihood ratio test) | <b>Inconsistency</b><br>(global Wald test) |
|----------------------------------------------------------------------------------------|------------------------------------------------------------|--------------------------------------------|
| Induction of clinical and endoscopic remission                                         | <i>p</i> -value = 0.25                                     | <i>p</i> -value = 0.93                     |
| Serious adverse events (SAEs)                                                          | <i>p</i> -value = 0.99                                     | <i>p</i> -value = 0.91                     |
| Treatment discontinuations or withdrawals from the study due to adverse events (WDAEs) | <i>p</i> -value = 0.99                                     | <i>p</i> -value = 0.48                     |
